# Supplementary material for: Rationalization of single-molecule magnet behavior in a three-coordinate Fe(iii) complex with a high-spin state (S= 5/2)
Source: Royal Society of Chemistry journal article supplement (doi:10.1039/c8qi00701b), 2018-01-01
Supplement: c8qi00701b1.pdf [file c8qi00701b1.pdf]

*Supporting Information for*

**Rationalization of single-molecule magnet behavior in a three-coordinate Fe(III) complex with high-spin state ( $S = 5/2$ )**

Ning Ge,<sup>a</sup> Yuan-Qi Zhai,<sup>a</sup> Yi-Fei Deng,<sup>a</sup> You-Song Ding,<sup>a</sup> Tao Wu,<sup>a</sup> Zhen-Xing Wang,<sup>b</sup> Zhongwen Ouyang,<sup>b</sup> Hiroyuki Nojiri<sup>c</sup> and Yan-Zhen Zheng<sup>\*a</sup>

<sup>a</sup>Frontier Institute of Science and Technology (FIST), State Key Laboratory of Mechanical Behavior for Materials, MOE Key Laboratory for Nonequilibrium Synthesis of Condensed Matter, Xi'an Key Laboratory of Sustainable Energy and Materials Chemistry and School of Science, Xi'an Jiaotong University, 99 Yanxiang Road, Xi'an, Shaanxi 710054, P. R. China.

<sup>b</sup> National High Magnetic Field Center, Huazhong University of Science and Technology, Wuhan 430074, China.

<sup>c</sup> Institute for Materials Research (IMR), Tohoku University, Tohoku 980-8577, Japan

Email: [zheng.yanzhen@xjtu.edu.cn](mailto:zheng.yanzhen@xjtu.edu.cn) (Y.Z.Z)

**Table S1.** ZFS parameters in high spin Fe (III) complexes based on Magnetic Measurements (MM), Electron Paramagnetic Resonance (EPR), Inelastic Neutron Scattering (INS) and Far-Infrared Magnetic Resonance (FIMR).

| Complex                                                                                                              | $D(\text{cm}^{-1})$ | $E(\text{cm}^{-1})$ | $E/D$ | $g$   | Experimenta | $cn^a$ | Ref. |
|----------------------------------------------------------------------------------------------------------------------|---------------------|---------------------|-------|-------|-------------|--------|------|
| Fe <sup>III</sup> in Ferrichrome-A                                                                                   | -0.27               |                     | -0.25 | 2     | FIMR        | 6      | 1    |
| [Fe <sup>III</sup> (S <sub>2</sub> CNR <sub>2</sub> ) <sub>3</sub> ], NR <sub>2</sub> =<br>pyrrolidyl                | -2.14               |                     | -0.1  |       | FIMR        | 6      | 1    |
| [Fe <sup>III</sup> (Pydtc) <sub>3</sub> ]                                                                            | -2.14               |                     |       |       | MM          | 6      | 2    |
| [Fe <sup>III</sup> {L <sub>2</sub> NNOO}Cl(H <sub>2</sub> O)]                                                        | 7.2                 | 2.4                 |       | 2     | MM          | 6      | 3    |
| Fe doped in Al <sub>2</sub> O <sub>3</sub>                                                                           | 0.1683              | 0                   |       | 2.003 | EPR         | 6      | 4    |
| Fe(III)-EDTA                                                                                                         | 0.8                 | 0.27                |       |       | EPR         | 6      | 5    |
| Fe in PbTiO <sub>3</sub>                                                                                             | 1.176               | 0                   |       | 2.002 | EPR         | 6      | 6    |
| Fe in Al <sub>2</sub> O <sub>3</sub> -hercynite                                                                      | 0.185               | 0.0015              |       | 2.002 | EPR         | 6      | 7    |
| [Fe(DMSO) <sub>6</sub> ](NO <sub>3</sub> ) <sub>3</sub>                                                              | 0.197               | 0.017               | 0.086 |       | EPR         | 6      | 8    |
| ET <sub>4</sub> [AlFe(C <sub>2</sub> O <sub>4</sub> ) <sub>3</sub> ]·G,<br>Al/G = H <sub>3</sub> O/PhF               | 0.31                |                     |       | 1.965 | MM          | 6      | 9    |
| Al/G = H <sub>3</sub> O/PhCl                                                                                         | 0.65                |                     |       | 2.024 | MM          | 6      | 9    |
| Al/G = H <sub>3</sub> O/PhBr                                                                                         | 0.52                |                     |       | 2.001 | MM          | 6      | 9    |
| (OEP)Fe(η <sup>2</sup> -ON(t-Bu)NO)                                                                                  | 3.89                |                     | 0.07  | 2     | EPR         | 6      | 10   |
| (TPP)Fe(η <sup>2</sup> -ON(t-Bu)NO)                                                                                  | 3.89                |                     | 0.07  | 2     | EPR         | 6      | 10   |
| [Fe(Ln)X]                                                                                                            | 0.5                 |                     |       |       | MM          | 6      | 11   |
| TBA <sub>7</sub> H <sub>10</sub> [(A-α-XW <sub>9</sub> O <sub>34</sub> ) <sub>2</sub> Fe<br>II <sup>X</sup> , X = Ge | -1.26               | -0.476              |       |       | MM          | 6      | 12   |
| II <sup>X</sup> , X = Si                                                                                             | -1.22               | -0.248              |       |       | MM          | 6      | 12   |
| [Fe <sup>III</sup> (DP)(OMe)]                                                                                        | 4.65                |                     |       |       | FIMR        | 5      | 13   |
| [Fe <sup>III</sup> (DP)(OPh)]                                                                                        | 5.45                |                     |       |       | FIMR        | 5      | 13   |
| [Fe <sup>III</sup> (DP)(ac)]                                                                                         | 6.9                 |                     |       |       | FIMR        | 5      | 13   |
| [Fe <sup>III</sup> (daDP)Cl]                                                                                         | 7.89                |                     |       |       | FIMR        | 5      | 13   |
| [Fe <sup>III</sup> (DP)F]                                                                                            | 5.55                |                     |       |       | FIMR        | 5      | 1    |
| [Fe <sup>III</sup> (DP)Cl]                                                                                           | 8.95                |                     |       |       | FIMR        | 5      | 1    |
| [Fe <sup>III</sup> (DP)Br]                                                                                           | 11.8                |                     |       |       | FIMR        | 5      | 1    |
| [Fe <sup>III</sup> (DP)I]                                                                                            | 16.4                |                     |       |       | FIMR        | 5      | 1    |
| [Fe <sup>III</sup> (DP)N <sub>3</sub> ]                                                                              | 7.32                |                     | 0.036 |       | FIMR        | 5      | 1    |
| [Fe <sup>III</sup> (PP)F]                                                                                            | 5                   |                     |       |       | FIMR        | 5      | 1    |
| [Fe <sup>III</sup> (PP)Cl]                                                                                           | 6.95                |                     |       |       | FIMR        | 5      | 1    |
| [Fe <sup>III</sup> (PP)N <sub>3</sub> ]                                                                              | 9.1                 |                     | 0.085 |       | FIMR        | 5      | 1    |
| Met-hemoglobin                                                                                                       | 10.7                |                     |       | 1.95  | EPR         | 5      | 14   |
| Fe(salen)BzO                                                                                                         |                     |                     | 0.31  |       | EPR         | 5      | 15   |
| Met-myoglobin                                                                                                        | 9-9.5               |                     |       | 1.98  | EPR         | 5      | 16   |
| [Fe <sup>III</sup> {L <sub>1</sub> NNOO}Cl]·CH <sub>3</sub> CN                                                       | 10.2                | 3.4                 |       | 2     | MM          | 5      | 3    |
| [Fe <sup>III</sup> H <sub>3</sub> buea(O)] <sup>2-</sup>                                                             | -0.7                |                     | 0.005 | 2     | EPR         | 5      | 17   |
| [Fe <sup>III</sup> H <sub>3</sub> buea(OH)] <sup>-</sup>                                                             | -2.4                |                     | 0.157 | 2.010 | EPR         | 5      | 17   |
| [Fe(TPP)X], H <sub>2</sub> TPP = tetraphenylporphyrin<br>X = F                                                       | 4.49                |                     |       |       | INS         | 5      | 18   |
| X = Cl                                                                                                               | 6.33                |                     |       |       | INS         | 5      | 18   |
| X = Br                                                                                                               | 8.8                 | 0.1                 |       |       | INS         | 5      | 18   |
| X = I                                                                                                                | 13.4                | 0.3                 |       |       | INS         | 5      | 18   |
| ( <sup>A</sup> L)Fe(NAd)                                                                                             | 1                   |                     | 0.01  | 2     | MM          | 3      | 19   |

<sup>a</sup> cn = Coordination number

**Table S2.** Crystal data and structure refinement for **1**

| <b>1</b>                                    |                                                                  |
|---------------------------------------------|------------------------------------------------------------------|
| formula                                     | C <sub>18</sub> H <sub>54</sub> FeN <sub>3</sub> Si <sub>6</sub> |
| Molecular weight /g mol <sup>-1</sup>       | 537.02                                                           |
| Crystal system                              | Trigonal                                                         |
| Space group                                 | <i>P</i> -31 <i>c</i>                                            |
| <i>a</i> , Å                                | 16.1834(6)                                                       |
| <i>b</i> , Å                                | 16.1834(6)                                                       |
| <i>c</i> , Å                                | 8.4220(3)                                                        |
| <i>α</i> , deg                              | 90                                                               |
| <i>β</i> , deg                              | 90                                                               |
| <i>λ</i> , deg                              | 120                                                              |
| <i>V</i> , Å <sup>3</sup>                   | 1910.23(16)                                                      |
| <i>Z</i>                                    | 2                                                                |
| <i>D</i> <sub>cal</sub> /g cm <sup>-3</sup> | 0.934                                                            |
| temperature, K                              | 150                                                              |
| 2 <i>θ</i> range/°                          | 5.644 to 51.038                                                  |
| completeness                                | 98.6%                                                            |
| residual map, e Å <sup>-3</sup>             | 0.966/-0.338                                                     |
| Goodness-of-fit on F <sup>2</sup>           | 1.094                                                            |
| Final indices [ <i>I</i> > 2σ( <i>I</i> )]  | <i>R</i> <sub>1</sub> = 0.0398, <i>wR</i> <sub>2</sub> = 0.1160  |
| <i>R</i> indices (all data)                 | <i>R</i> <sub>1</sub> = 0.0446, <i>wR</i> <sub>2</sub> = 0.1219  |

**Table S3.** Selected bond lengths (Å) and angles (°) for complex **1**

| Bonds        | Å        | Angles              | °        |
|--------------|----------|---------------------|----------|
| Fe(1)-N(1)#1 | 1.907(1) | N(1)#1-Fe(1)-N(1)   | 120.0(1) |
| Fe(1)-N(1)#2 | 1.907(1) | N(1)#1-Fe(1)-N(1)#2 | 120.0(1) |
| Fe(1)-N(1)   | 1.907(1) | N(1)-Fe(1)-N(1)#2   | 120.0(1) |
| Si(1)-N(1)   | 1.749(3) | N(1)-Si(1)-C(3)     | 109.9(2) |
| Si(1)-C(3)   | 1.865(5) | N(1)-Si(1)-C(1)     | 112.5(2) |
| Si(1)-C(1)   | 1.877(5) | N(1)-Si(1)-C(2)     | 112.4(2) |
| Si(1)-C(2)   | 1.872(5) | C(3)-Si(1)-C(1)     | 108.5(3) |
| N(1)-Si(1)#3 | 1.749(3) | C(3)-Si(1)-C(2)     | 106.2(3) |
|              |          | C(2)-Si(1)-C(1)     | 107.1(3) |
|              |          | Si(1)-N(1)-Fe(1)    | 119.7(2) |
|              |          | Si(1)#3-N(1)-Fe(1)  | 119.7(2) |
|              |          | Si(1)#3-N(1)-Si(1)  | 120.6(3) |

Symmetry transformations used to generate equivalent atoms:

#1 -y+1, x-y, z    #2 -x+y+1, -x+1, z    #3 x, x-y, -z+1/2

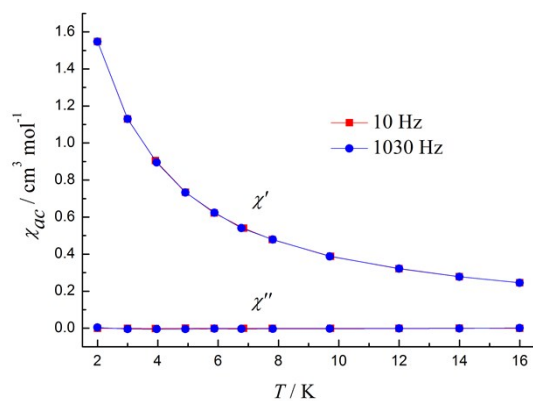

**Fig. S1.** Temperature-dependent in-phase ( $\chi'$ ) and out-of-phase ( $\chi''$ ) ac susceptibility for **1** in the zero applied field. The lines are guides to the eyes.

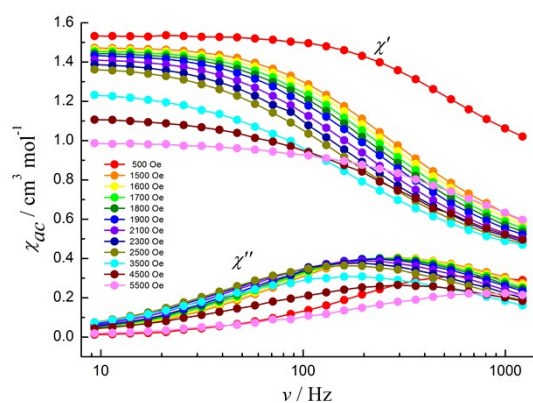

**Fig. S2.** Frequency-dependent in-phase ( $\chi'$ ) and out-of-phase ( $\chi''$ ) ac susceptibility for **1** at 2 K under various dc fields. The lines are guides to the eyes.

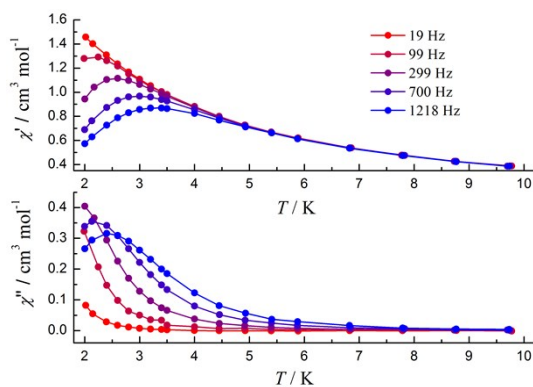

**Fig. S3.** Temperature-dependent in-phase ( $\chi'$ ) and out-of-phase ( $\chi''$ ) ac susceptibility for **1** under 1600 Oe applied field. The lines are guides to the eyes.

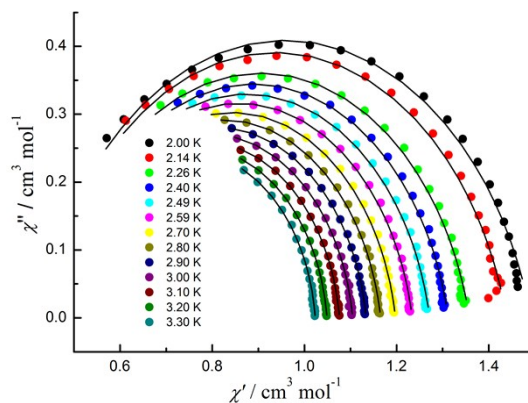

**Fig. S4.** Cole-Cole plots for **1** at 1600 Oe dc field. The solid lines represent a fit to the data.

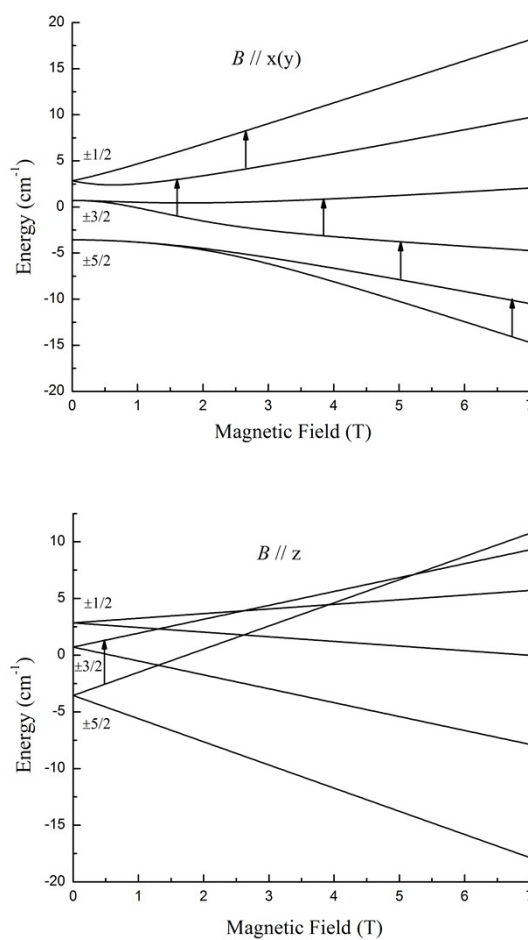

**Fig. S5.** Magnetic field dependent energy levels in the three canonical orientations of the field relative to the principal zfs axis calculated for **1**. Top: Arrows stand for EPR transitions along x(y) orientation in 120 GHz; Bottom: Arrows stand for EPR transitions along z orientation in 120 GHz.

**Table S4.** The relative energies of ground and low-lying quartet spin eigenstates ( $\text{cm}^{-1}$ ).

|              |       |
|--------------|-------|
| ${}^6\Psi_0$ | 0.0   |
| ${}^4\Psi_0$ | 15782 |
| ${}^4\Psi_1$ | 20021 |

|           |       |
|-----------|-------|
| $4\Psi_2$ | 21348 |
| $4\Psi_3$ | 33547 |
| $4\Psi_4$ | 39944 |
| $4\Psi_5$ | 42145 |
| $4\Psi_6$ | 46743 |
| $4\Psi_7$ | 56723 |
| ...       | ...   |

**Table S5.** The relative energy of d-orbitals for **1**. ( $\text{cm}^{-1}$ ).

|               |       |
|---------------|-------|
| $d_z^2$       | 0     |
| $d_{xz}$      | 3734  |
| $d_{yz}$      | 4912  |
| $d_{xy}$      | 13836 |
| $d_{x^2-y^2}$ | 16143 |

**Table S6.** Individual contribution to  $D$ -tensor calculated by CASSCF/NEVPT2 ( $\text{cm}^{-1}$ )

| Multiplicity | Root | $D$   |
|--------------|------|-------|
| 6            | 0    | 0     |
| 4            | 1    | -1.47 |
|              | 2    | 0.51  |
|              | 4    | -0.49 |
|              | 5    | 0.11  |
|              | ...  | ...   |
| 2            | -    | $0^b$ |

<sup>b</sup> Only  $D$  values with  $> 0.1$  are given in this table.

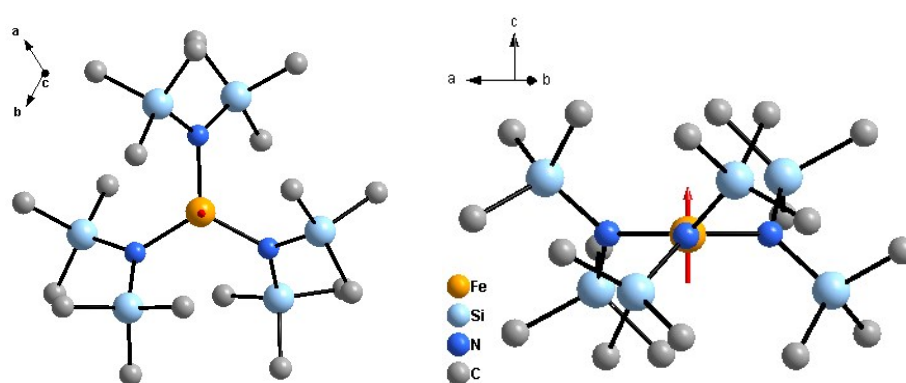

**Fig. S6.** Orientation of the main axis of the  $g$  tensor viewed from top (left) and side (right) for the ground state KD of complex **1**.

- (1) G. C. Brackett, P. L. Richards and W. S. Caughey, *J. Chem. Phys.*, 1971, **54**, 4383.
- (2) B. N. Figgis and G. E. Toogood, *J. Chem. Soc. Dalton*, 1972, 2177.
- (3) H. L. Shyu, H. H. Wei, G. H. Lee and Y. Wang, *J. Chem. Soc. Dalton*, 2000, 915-918.

- (4) A. Priem, P. J. M. van Bentum, W. R. Hagen and E. J. Reijerse, *Appl. Magn. Reson.*, 2001, **21**, 535-548.
- (5) K. K. Andersson, P. P. Schmidt, B. Katterle, K. R. Strand, A. E. Palmer, S. K. Lee, E. I. Solomon, A. Graslund and A. L. Barra, *J. Biol. Inorg. Chem.*, 2003, **8**, 235-247.
- (6) H. Mestric, R. A. Eichel, K. P. Dinse, A. Ozarowski, J. van Tol and L. C. Brunel, *J. Appl. Phys.*, 2004, **96**, 7440-7444.
- (7) F. Di Benedetto, G. B. Andreozzi, G. Baldi, A. Barzanti, G. P. Bernardini, V. Faso, L. A. Pardi and M. Romanelli, *J. Eur. Ceram. Soc.*, 2006, **26**, 2301-2305.
- (8) A. Solano-Peralta, J. P. Saucedo-Vazquez, R. Escudero, H. Hopfl, H. El-Mkami, G. M. Smith and M. E. Sosa-Torres, *Dalton T.*, 2009, 1668-1674.
- (9) E. Coronado, S. Curreli, C. Gimenez-Saiz and C. J. Gomez-Garcia, *Inorg. Chem.*, 2012, **51**, 1111-1126.
- (10) N. Xu, J. H. Christian, N. S. Dalal, E. G. Abucayon, C. Lingafelt, D. R. Powell and G. B. Richter-Addo, *Dalton T.*, 2015, **44**, 20121-20130.
- (11) L. Pogany, J. Moncol, J. Pavlik and I. Salitros, *New. J. Chem.*, 2017, **41**, 5904-5915.
- (12) T. Minato, D. Aravena, E. Ruiz, K. Yamaguchi, N. Mizuno and K. Suzuki, *Inorg. Chem.*, 2018, **57**, 6957-6964.
- (13) P. L. Richards, W. S. Caughey, Eberspac.H, G. Feher and M. Malley, *J. Chem. Phys.*, 1967, **47**, 1187.
- (14) Y. Alpert, Y. Couder, Tuchendl.J and H. Thome, *Biochim. Biophys. Acta.*, 1973, **322**, 34-37.
- (15) T. A. Kent, E. Munck, J. W. Pyrz, J. Widom and L. Que, *Inorg. Chem.*, 1987, **26**, 1402-1408.
- (16) P. J. M. van Kan, E. van der Horst, E. J. Reijerse, P. J. M. van Bentum and W. R. Hagen, *J. Chem. Soc. Faraday T.*, 1998, **94**, 2975-2978.
- (17) R. Gupta, D. C. Lacy, E. L. Bominaar, A. S. Borovik and M. P. Hendrich, *J. Am. Chem. Soc.*, 2012, **134**, 9775-9784.
- (18) S. E. Stavretis, M. Atanasov, A. A. Podlesnyak, S. C. Hunter, F. Neese and Z. L. Xue, *Inorg. Chem.*, 2015, **54**, 9790-9801.
- (19) M. J. T. Wilding, D. A. Iovan and T. A. Betley, *J. Am. Chem. Soc.*, 2017, **139**, 12043-12049.
